1 **Characterization of a thalamic nucleus mediating habenula**  
2 **responses to change in illumination**

3 <sup>§</sup>Ruey-Kuang Cheng<sup>1</sup>, <sup>§</sup>Seetha Krishnan<sup>2</sup>, Qian Lin<sup>2</sup>, Caroline Kibat<sup>3</sup> and \*Suresh  
4 Jesuthasan<sup>1, 3, 4, 5</sup>

5 <sup>1</sup>Lee Kong Chian School of Medicine, Nanyang Technological University, Singapore  
6 636921.

7 <sup>2</sup>NUS Graduate School for Integrative Sciences and Engineering, 28 Medical Drive,  
8 National University of Singapore, Singapore 117456.

9 <sup>3</sup>Neural Circuitry and Behavior Laboratory, Institute of Molecular and Cell Biology,  
10 Singapore 138673.

11 <sup>4</sup>Neuroscience and Behavioral Disorders Program, Duke-NUS Graduate Medical  
12 School, 8 College Road, Singapore 169857.

13 <sup>5</sup>Department of Physiology, National University of Singapore, Singapore 117597.

14 \*Corresponding author: sureshj@ntu.edu.sg; +65 65869545

15 <sup>§</sup>equal contribution

16

17

18

19 **Abstract**

20 **Background**

21 Neural activity in the vertebrate habenula is affected by changes in ambient  
22 illumination. The nucleus that links photoreceptors with the habenula is not well  
23 characterized. Here, we describe the location, inputs and potential function of this  
24 nucleus in larval zebrafish.

25 **Results**

26 High-speed calcium imaging shows that onset and offset of light evokes a rapid  
27 response in the dorsal left neuropil of the habenula, indicating preferential targeting  
28 of this neuropil by afferents mediating response to change in irradiance. Injection of a  
29 lipophilic dye into this neuropil led to bilateral labeling of a nucleus in the anterior  
30 thalamus that responds to onset and offset of light, and that receives innervation from  
31 the retina and pineal organ. Lesioning the neuropil of this thalamic nucleus reduced  
32 the habenula response to light. Optogenetic stimulation of the thalamus with  
33 channelrhodopsin-2 caused depolarization in the habenula, while manipulation with  
34 anion channelrhodopsins inhibited habenula response to light and disrupted climbing  
35 and diving that is evoked by irradiance change.

36 **Conclusions**

37 A nucleus in the anterior thalamus of larval zebrafish innervates the dorsal left  
38 habenula. This nucleus receives input from the retina and pineal, responds to  
39 increase and decrease in irradiance, enables habenula responses to change in  
40 irradiance, and may function in light-evoked vertical migration.

41 **Keywords:**

42 Thalamus, Zebrafish, Calcium imaging, Habenula, Irradiance, Non-visual, Two-  
43 photon imaging, diel vertical migration.

44 **Background**

45 The habenula is an evolutionarily conserved structure [1] that influences multiple  
46 behaviors, ranging from fear [2–4], to learning [5 - 7], addiction [8], sleep [9],  
47 aggression [10,11] and performance under stress [12]. One function of the habenula  
48 is to regulate the release of broadly-acting neuromodulators such as serotonin,  
49 dopamine, epinephrine and histamine [12–15]. To precisely control these  
50 neuromodulators, the habenula integrates diverse variables including internal state,  
51 reward value and sensory stimuli. This information reaches the habenula from  
52 distinct sources. For example, circadian time is transmitted to the habenula by  
53 hypocretin-secreting neurons located in the hypothalamus [16]. Negative reward or  
54 punishment is conveyed by neurons of the entopeduncular nucleus (internal segment  
55 of the globus pallidus) [17]. Olfactory stimuli evoke activity in the habenula [18,19] via  
56 a direct innervation of mitral cells from the olfactory bulb [20]. Light as well as loss of  
57 light can also cause activity in the habenula, as has been demonstrated in rat [21],  
58 mouse [22], pigeon [23] and zebrafish [18,24], but the neurons regulating habenula  
59 responses to changes in ambient illumination are not well defined.

60 The habenula is divided into two major regions based on pattern of connectivity. In  
61 mammals, these are called the medial and lateral habenula, while in fish these are  
62 the dorsal and ventral habenula [25]. In larval zebrafish, short pulses of red light  
63 cause asymmetric depolarization of the dorsal habenula, with a stronger response on  
64 the left side [18]. This response is lost in fish lacking eyes [18]. However, no direct  
65 pathway from the retina to the habenula has been documented [26,27]. By retrograde

66 tracing in adult zebrafish, Turner et al proposed that the habenula receives input from  
67 the nucleus rostromedialis [28], a diencephalic structure with retinal input that has  
68 been described in several ray-finned fish [29,30]. Because injections into both left  
69 and right habenula led to labeling of this structure, and also because of potential  
70 artifacts in labeling, the authors concluded that the source of light-evoked activity in  
71 the habenula could not be determined [28]. Here, we set out to characterize the  
72 nucleus by which ambient light affects activity in the habenula and to explore the  
73 function of this nucleus in innate responses to change in irradiance.

## 74 **Results**

### 75 **Habenula afferents mediating response to change in irradiance target the dorsal** 76 **left neuropil**

77 The zebrafish habenula consists of neurons surrounding neuropils that are  
78 innervated by afferent neurons located in different regions of the brain [20,25,28,31].  
79 To identify neurons that mediate light-evoked activity in the habenula, we sought to  
80 determine which neuropils are affected by this stimulus; blue light was used as the  
81 stimulus, as the habenula has a strong response to this wavelength [32]. We first  
82 used wide-field microscopy, which has a large depth-of field and thus provides an  
83 overview of stimulus-evoked fluorescence. Imaging was carried out on  
84 *elavl3:GCaMP6f* fish, which have broad expression of the calcium indicator. The  
85 exposure time (5 msec; 200 Hz) was shorter than the rise time of GCaMP6f (~80  
86 msec; see supplementary table 1 in [33]), so the initial image primarily reflected  
87 activity prior to effects of the stimulating light. With this approach, a rapid increase in  
88 fluorescence was detected in a discrete region in the dorsal left habenula following  
89 onset of the blue light used to excite the reporter (Fig. 1a-c; n = 5 fish). This suggests  
90 that onset of light activates a neuropil in the left habenula.

91 Two-photon microscopy was used next, as this allows higher spatial resolution  
92 imaging before, during and after delivery of a more precisely timed light stimulus.  
93 Imaging was carried out using *GAL4s1011t, UAS:GCaMP6s* fish, in which expression  
94 of the calcium reporter is restricted mainly to habenula neurons [19]. In agreement  
95 with wide-field microscopy, onset of light was found to trigger a response in the  
96 dorsal left neuropil of the habenula (Fig. 1d-h; blue pixels). Responses in the  
97 neuropil, which contains dendrites of habenula neurons, correlated with but preceded  
98 the response of the cell body of habenula neurons (Fig. 1i-k). These observations  
99 suggest that neurons mediating the habenula response to light reside outside the  
100 habenula and target the dorsal left neuropil.

101 In addition to responses to the presence of light, we also detected a response to the  
102 offset of light in the dorsal left neuropil (Fig. 1g, h; magenta pixels). As with the  
103 response to light ON, the light OFF response in the neuropil preceded the response  
104 in habenula neurons (Fig. 1k). Two different classes of response to light OFF could  
105 be seen in habenula neurons (Fig. 2). In one, the activity was suppressed during light  
106 ON and increased after offset of light; in the other, there was an increase in activity  
107 after the pulse of light but there was no decrease during the pulse (Fig. 2a-c). The  
108 former class is referred to as INH (for “inhibited”). All three classes of neurons – ON,  
109 OFF and INH – were more numerous in the dorsal left habenula as compared with  
110 the right (Fig. 2d), similar to what has been reported before for neurons that respond  
111 to the onset of red light [18]. Responses were seen in all ages examined (5 – 10 dpf)  
112 (Fig. 2e), indicating that this phenomenon is not restricted to early stages of nervous  
113 system development. These observations suggest that the dorsal left habenula is  
114 innervated by neurons that respond to light and darkness.

## 115 **A thalamic nucleus innervates the habenula**

116 To identify afferents to the dorsal left neuropil, the lipophilic tracer DiD was injected  
117 here (Fig. 3a; n = 10 fish). This led to bilateral labeling of a cluster of neurons  
118 posterior to the zona limitans thalamica (ZLI) (Fig. 3b, c, Movie 1 (Additional File 1)).  
119 In contrast, when the right dorsal habenula was injected with DiD, label was seen  
120 primarily in the ipsilateral entopeduncular nucleus (Fig. 3d, Movie 2 (Additional File  
121 2); n = 4 fish). We hypothesized that neurons innervating the dorsal left habenula  
122 belong to a thalamic nucleus, given their position relative to the ZLI, which marks the  
123 anterior limit of the thalamus. A feature of the thalamus in zebrafish is the presence  
124 of GABAergic neurons at the rostral margin [34]; in general, first-order thalamic nuclei  
125 contain GABAergic interneurons that synapse onto the axons of incoming sensory  
126 neurons [35]. Thus, if the habenula-projecting nucleus were a thalamic nucleus, it  
127 would be expected to contain GABAergic neurons that extend neurites into its  
128 neuropil. Consistent with this, DsRed that was driven by the *gad1b* promoter [36] was  
129 seen in cells posterior to the ZLI and in the neuropil of the anterior thalamus (Fig. 3e;  
130 Movie 3 (additional file 3)). Additionally, immunofluorescence with the GAD65/67  
131 antibody labeled the neuropil containing retrogradely labeled habenula afferents (Fig.  
132 3f). Given the location and the presence of GABAergic neurons, the neurons that  
133 innervates the dorsal left habenula appear to be located within an anterior thalamic  
134 nucleus.

135 Thalamic nuclei usually contain glutamatergic projection neurons [35], but may in  
136 rare cases extend GABAergic projections [37]. When DiD was injected into the dorsal  
137 left habenula, approximately 45% of retrogradely labelled thalamic neurons  
138 expressed eGFP under the control of the vGlut2 GAL4 driver [36] (arrowheads, Fig.  
139 3b; Movie 4; n = 3 fish), consistent with projection neurons being glutamatergic. We  
140 asked whether any of the afferent neurons might be GABAergic, as this is one

141 possible mechanism for the suppression of activity seen in INH neurons. However,  
142 no retrograde DiD label was seen in thalamic cells labeled by *gad1b:DsRed* (see  
143 Movie 1 and Movie 4), nor were there DsRed labeled neurites in the dorsal left  
144 habenula neuropil (see Movie 3), as would be expected if there was innervation by  
145 GABAergic neurons. Moreover, when the fixable dye CM-Dil was injected into the  
146 dorsal left habenula, followed by immunofluorescence with the antibody to  
147 GAD65/67, no double-labeled cells were seen (Fig. 3f, n = 6 fish). It is unclear  
148 whether this is due to the low probability of labeling the relevant GABAergic cells with  
149 lipophilic tracing or with the transgene, or, more simply, if there are no GABAergic  
150 projections from the thalamus to the habenula. It is evident, however, that the  
151 anterior thalamus sends glutamatergic projections to the habenula.

#### 152 **Irradiance change evokes activity in the anterior thalamus**

153 If the anterior thalamic nucleus mediates illumination-dependent activity in the  
154 habenula, neurons here should respond to increase and decrease of illumination. To  
155 test this, calcium imaging was carried out in *GAL4s1020t, UAS:GCaMP6s* transgenic  
156 fish, which expresses the calcium indicator in thalamic neurons. Given the depth  
157 spanned by thalamic neurons innervating the dorsal left habenula (Fig. 3c), multiple  
158 planes were imaged, using a piezo-drive for fast focusing and resonant scanning for  
159 fast acquisition. A response to increase or decrease in illumination was detected in  
160 cell bodies of the anterior thalamus (Fig. 4a-j) in all fish imaged (n = 10). A minority of  
161 cells (yellow) responded to both increase and decrease. Responses could also be  
162 seen in the thalamic neuropil (Fig. 4k-m), which would be expected to receive driver  
163 (i.e. sensory [35]) inputs. The response to light was stronger for blue than for red light  
164 (Fig. 4n-r) as was seen previously with lower resolution whole-brain imaging [32].  
165 Thus, calcium imaging supports the hypothesis that the anterior thalamic nucleus  
166 mediates responses to both increase and decrease in illumination, and also shows

167 that it is more responsive to blue rather than red light.

168 The habenula response to light has been reported to be eye dependent [19]. To test  
169 if the habenula-projecting thalamic nucleus is innervated by retinal ganglion cell  
170 (RGC) axons, Dil was injected into the retina in fish where DiD had been injected into  
171 the dorsal left habenula. RGC axons could be seen to intermingle with neurites from  
172 DiD labeled neurons in the neuropil of the anterior thalamus (Fig. 5a, Movie 5  
173 (Additional File 5)). This terminal field may include the previously described AF4 and  
174 AF2 [26,27], given the position anterior and medial to the optic tract. Consistent with  
175 this, two regions within the anterior thalamus neuropil of *elavl3:GCaMP6f* fish (in  
176 which retinal ganglion cells are labelled) responded to change in illumination, with  
177 increase in irradiance causing activity more dorso-caudally while decrease caused  
178 activity more rostro-ventrally (Fig. 5b-h).

179 If the anterior thalamic nucleus functions as a relay for information from the retina to  
180 the habenula, the thalamic response to light should be absent in fish lacking eyes.  
181 Surprisingly, although the response to light ON was reduced, a response to light OFF  
182 could still be detected (Fig. 6a-l). This implies that there could be non-retinal inputs to  
183 this nucleus. One potential source may be the pineal organ, as injection of Dil into  
184 the pineal led to labelling of axons that extended into the neuropil of the anterior  
185 thalamus (Fig. 6m, n; Movie 6 (Additional File 6)), and the pineal has a response to  
186 light OFF (Fig. 6o, p). An OFF response was seen in the habenula in fish lacking  
187 eyes (Fig. 6q-s), consistent with the habenula being a target of the anterior thalamus,  
188 and the retina not being the sole source of sensory input to this nucleus.

### 189 **Lesion of the anterior thalamic neuropil inhibits habenula response to illumination** 190 **change**

191 To test if the anterior thalamic nucleus contributes to light-evoked activity in the



192 habenula, we lesioned the anterior thalamic neuropil with a femtosecond laser.  
193 *elavl3:GCamp6f* fish were used, to enable imaging prior to lesioning so that the  
194 thalamic neuropil could be visualized and the plane with the response to light  
195 identified. Repeated pulsing with the laser led to the formation of a cavitation bubble  
196 in the neuropil (Fig. 7a), a characteristic feature of two-photon lesioning of tissue  
197 [38,39], and resulted in a reduction of both ON and OFF responses in the habenula  
198 (Fig. 7b-g). As a control for specificity of the lesioning technique, we targeted the  
199 parapineal, a light-sensitive organ that is located adjacent to the left habenula and  
200 directly innervates the dorsal left neuropil (Fig. S1a (Additional File 7)). This did not  
201 have any significant effect on habenula response to blue light or darkness (Fig. S1),  
202 indicating that the lesioning technique used here does not cause indiscriminate  
203 damage to surrounding tissue. Moreover, these observations suggest that the  
204 parapineal does not have an essential role in habenula response to illumination  
205 conditions, consistent with the findings of Dreosti et al [18], whereas the anterior  
206 thalamus is required.

### 207 **Optogenetic manipulation of the thalamus affects habenula response to irradiance** 208 **change**

209 Physically lesioning the anterior thalamic neuropil with the femtosecond pulsed laser  
210 is a difficult experiment, due to the presence of a blood vessel in the neuropil: ~80%  
211 of lesioned animals could not be used due to bursting of this vessel. As an alternative  
212 method of silencing the thalamus, we developed a transgenic line expressing the  
213 anion channel rhodopsin ACR1 from *Guillardia theta* [40]. This channel generates a  
214 chloride current in the presence of green or blue light, thus hyperpolarizing neurons.  
215 We expressed this channel in thalamic neurons under the control of the *GAL4s1020t*  
216 driver; expression in the anterior thalamus was confirmed by the presence of the YFP

217 tag (Fig. 8a, b). This channel can be actuated in larval zebrafish by blue or green  
218 light at a power density of approximately  $3 \mu\text{W}/\text{mm}^2$  (see accompanying manuscript)  
219 [41]. With this level of light, fish expressing GtACR1 showed a reduced response in  
220 the dorsal left neuropil to light ON compared to non-expressing siblings (Fig. 8c-j),  
221 consistent with input from the thalamus being required.

222 Strikingly, there was a stronger response to the offset of light in GtACR1-expressing  
223 fish, compared to non-expressing siblings (Fig. 8g-k). This may be the result of  
224 depolarization at the termination of light-gated hyperpolarization, as has been  
225 reported for other light activated chloride channels [42,43] and for GtACR1 (see  
226 accompanying manuscript). This finding implies that depolarization of thalamic  
227 neurons can drive habenula activity. To test this more directly, we examined the  
228 effect of optogenetic activation of the thalamus with Channelrhodopsin-2 (Fig. 9).  
229 This experiment was carried out in fish lacking eyes, to prevent a visual response.  
230 Short pulses of blue light reproducibly caused an increase in fluorescence of  
231 GCaMP6f in habenula neurons of fish with expression of ChR2 in the thalamus (Fig.  
232 9b, f). No change in fluorescence was seen in the absence of blue light (Fig. 9c, d),  
233 indicating that the activity is due to the stimulus. Some response was seen in fish  
234 without ChR2 expression (Fig. 9e), suggesting that a component of the habenula  
235 response may be due to non-ocular sensors such as deep brain photoreceptors  
236 [44,45]. The larger response in fish with ChR2 expression (Fig. 9g-h), however, is  
237 consistent with the hypothesis that a thalamic nucleus regulates activity in the  
238 habenula of larval zebrafish.

239 **Optogenetic manipulation of the thalamus disrupts an innate behavioral response**  
240 **to irradiance change.**

241 Finally, we asked whether the anterior thalamic nucleus might be involved in an

242 innate behavior that is responsive to change of light. We hypothesized that one such  
243 behavior may be light-evoked vertical migration [44]. Larval zebrafish normally move  
244 upwards to the surface of a water column in the presence of blue or green light, but  
245 move downwards when the lights are switched off [32]. We tested the effect of  
246 optically manipulating the thalamus using the anion channel rhodopsins, reasoning  
247 that the presence of these channels would disrupt normal light-controlled responses:  
248 if no difference was seen, then the hypothesis should be rejected.

249 Fish expressing GtACR1 or GtACR2 under the control of the *GAL4s1020t* driver  
250 behaved differently from siblings (Fig. 10a, b). Rather than swimming upwards in the  
251 light, GtACR-expressing fish were seen to move downwards in the light and to swim  
252 upwards in the dark. This is reflected by a reversal in the correlation between position  
253 in the tank and illumination status in GtACR1 or GtACR2-expressing fish, in contrast  
254 to non-expressing siblings (Fig. 10c, e). One potential reason for GtACR-expressing  
255 fish to swim upward at the offset of light could be that there was a lack of space to  
256 move downwards, given their starting position near the bottom of the tank. To test  
257 whether space was a constraint, we plotted the direction of initial movement at light  
258 OFF as a function of position (Fig. 10d). Although GtACR1 fish were predominantly  
259 located near the base of the tank, a number were located in the middle of the tank,  
260 i.e. between a relative depth of 0.25 and 0.75, where they would have space to move  
261 up or down. A comparison of the behavior of fish in this region, using multilevel  
262 analysis to rule out nesting effects caused by repeated measures on the same fish  
263 [45], indicated significant difference between GtACR1-expressing fish and siblings  
264 ( $\chi^2=6.8958$ ,  $p = 0.0088$ ,  $df = 1$ ). We also investigated whether the lack of climbing  
265 could be due to an inability to swim in the presence of light, given that the  
266 *GAL4s1020t* line can drive effector genes in motor neurons [46]. As shown in Fig.  
267 10g-h, both GtACR1 and GtACR2 expressing fish moved less than siblings in the

268 presence of light, although there was not a complete cessation of movement. Thus,  
269 while some of the loss of climbing in the presence of light could be due to nonspecific  
270 effects, the overall result, including the downward movement in the light and climbing  
271 at light offset is consistent with the hypothesis that the anterior thalamic nucleus has  
272 a role in climbing behavior that is normally triggered by light.

## 273 **Discussion**

274 Imaging with wide-field and two-photon microscopy demonstrates that the dorsal left  
275 neuropil of the zebrafish habenula is stimulated by change in light, consistent with  
276 previous reports of an asymmetric response in habenula neurons to a flash of light  
277 [18]. Lipophilic tracing demonstrates that this neuropil is asymmetrically innervated  
278 by a nucleus in the anterior region of both left and right thalamus. The anterior  
279 thalamic nucleus receives input from the retina and pineal, and responds to change  
280 in irradiance. Lesion of the anterior thalamic neuropil or optogenetic silencing of the  
281 thalamus inhibited light-evoked activity in the habenula, while optogenetic stimulation  
282 of the thalamus drove activity in the habenula. Thus, by optical recording, anatomical  
283 tracing, optical manipulation and lesion, our data suggests that an anterior thalamic  
284 nucleus mediates the habenula responses to irradiance change in larval zebrafish.

285 The thalamic nucleus that projects to the habenula can be functionally separated into  
286 two domains, based on the response to light – excitation to light OFF in the anterior-  
287 ventral regions and excitation to light ON more dorso-posteriorly. This neuropil  
288 contains two previously defined targets of retinal ganglion cells, AF2 and AF4 [27],  
289 that have this location. AF4 is innervated predominantly by M3 and M4 retinal  
290 ganglion cells, which extend their dendritic tree into the proximal layer of the inner  
291 plexiform layer and are considered ON neurons [27]. AF2 is innervated by B1 retinal  
292 ganglion cells that have dendrites in the distal layer [27], and these may account for  
293 the OFF responses in the thalamus and habenula. The pineal may also be

294 responsible for a component of OFF responses: pineal cells appear to depolarize in  
295 darkness, and pineal fibers innervate the thalamic neuropil of larval zebrafish, as has  
296 been reported for adult zebrafish [47].

297 As in the anterior thalamus, a response to the loss of light was seen in the habenula.  
298 This has a number of implications. Firstly, this suggests that darkness itself may be a  
299 stimulus, in which case the level of activity in habenula neurons during darkness prior  
300 to a light stimulus cannot be taken to be a “ground” state. Such activity may include  
301 what has been termed spontaneous activity [48], but may additionally reflect the  
302 current state of the animal (i.e. the effects of being in the dark, which is aversive to  
303 larval zebrafish [49]). Secondly, the fact that there is more than one class of  
304 habenula response to darkness implies that there may be more than one mechanism  
305 involved. In particular, the suppression of activity in the presence of light in INH  
306 neurons implies that a part of the OFF response could involve active inhibition. As  
307 yet, there is no evidence that there is direct hyperpolarization of habenula neurons  
308 during light ON. However, inhibition need not occur in the habenula, but could occur  
309 in the thalamus, where there are GABAergic neurons that extend neurites into the  
310 thalamic neuropil. Inhibition of thalamic OFF neurons by thalamic ON neurons, for  
311 example, could lead to the observed pattern in habenula INH neurons.

312 The thalamic nucleus mediating activity in the habenula may represent the nucleus  
313 rostromedialis, as proposed by Turner et al [28]. The nucleus rostromedialis was  
314 initially described as a dorsal thalamic nucleus that receives retinal input [50].  
315 However, it was more recently suggested that this nucleus is an extension of the  
316 habenula, due to apparent innervation of the interpeduncular nucleus (IPN) [30]. We  
317 find no evidence that the nucleus identified here has a direct connection to the IPN.  
318 The *GAL4s1020t, UAS:GCaMP6s* line which was used for calcium imaging the  
319 thalamic response, for example, does not label axons extending to the IPN.

320 Moreover, the *GAL4s1011t* driver, which labels the habenula neurons and axons that  
321 extend to the IPN, does not label the nucleus with retinal input. It is thus unclear  
322 whether the nucleus identified here is different from the nucleus rostrrolateralis  
323 described in the butterfly fish, or if there was a labeling artifact in the tracing  
324 experiment [30].

325 While this manuscript was in review, it was suggested that light-evoked activity in the  
326 habenula is driven by input from the thalamic eminence (EmT) [51], an “ambiguous  
327 thalamic structure” [34] that has been proposed to give rise to the glutamatergic bed  
328 nucleus stria medullaris (BNSM) [34,52] or the ventral entopeduncular nucleus, a  
329 homolog of the globus pallidus [28]. However, the nucleus characterized here is  
330 distinct from the ventral entopeduncular nucleus, which is located more anteriorly and  
331 ventrally [28]. It also contains GABAergic neurons, and is thus unlikely to be the  
332 BNSM. It is possible that the nucleus here is an additional derivative of the EmT,  
333 although this remains to be demonstrated with lineage tracing. Intriguingly, Zhang et  
334 al [51] show that the retinal inputs to AF4 express the melanopsin-related gene  
335 *opn4xa*, consistent with our finding that the thalamic response to light is stronger for  
336 blue light relative to red light, and another report that the habenula response is  
337 stronger for blue light [32]. In mammals, melanopsin expressing retinal ganglion cells  
338 target a number of thalamic structures, including the intergeniculate leaflet and the  
339 margin of the lateral habenula [53]. The latter region may correspond to the para-  
340 habenular termination zone, which is located in the anterodorsal thalamic nucleus  
341 [54]. Whether either of these regions is homologous to the zebrafish nucleus  
342 described here remains to be determined.

343 Neurons in the anterior thalamus have a prominent sustained response to blue light  
344 (see Fig. 4a-e and [32]), and may be involved in a behavior that is evoked by blue  
345 light, which is vertical migration. This response is disrupted by expression of anion

346 channelrhodopsins in the anterior thalamus, suggesting that the behavior is not  
347 independent of the thalamus. A limitation of this experiment, however, is that the  
348 driver line used also causes expression of the channel in spinal motor neurons [46].  
349 Silencing of these neurons may contribute to reduced ability of GrACR1 and GtACR2  
350 fish to move upwards in the light. However, the offset of light, which causes activity in  
351 networks containing light-gated chloride channels (see Fig. 8) [43,55], led to upward  
352 movement. This is unlikely to be due only to rebound activation of motor neurons, as  
353 there is a choice of which direction to move. Instead, the upward movement at light  
354 offset is consistent with the hypothesis that activation of the thalamus may drive  
355 vertical migration.

356 A projection from the thalamus to the habenula may be evolutionarily conserved in  
357 vertebrates. Using retrograde tracing with horseradish peroxidase, a projection from  
358 the dorsal thalamus to the habenula has been reported in a lizard [56] and in the frog  
359 [57]. In humans and rabbits, a thalamo-habenula projection was proposed many  
360 years ago based on degeneration experiments [58,59], but evidence with modern  
361 tracing techniques is lacking. Hints of a projection can be seen in a tracing  
362 experiment performed in rats [60], but this remains to be confirmed. The mesoscale  
363 mouse connectome project [61] also suggests that such a projection may exist, but  
364 the large volume of label means that the possibility of label from neighboring regions  
365 cannot be excluded. In humans, resting state functional magnetic resonance imaging  
366 indicates that the habenula and thalamus are directly connected [62,63]. However, it  
367 remains to be determined whether this connection is direct. The findings in lower  
368 vertebrates suggest that it may be worthwhile revisiting efferent connectivity of the  
369 anterior thalamus in mammals and investigating if and how this mediates non-visual  
370 responses to light.

## 371 **Conclusions**

372 A nucleus in anterior thalamus of zebrafish enables habenula responses to increase  
373 and decrease in ambient illumination. This nucleus is innervated by the retina and  
374 pineal. It may function in vertical migration triggered by light.

## 375 **Methods**

376 Experiments were performed in accordance with guidelines issued by the Institutional  
377 Animal Care and Use Committee of the Biological Resource Centre at Biopolis,  
378 Singapore.

## 379 **Fish lines**

380 Zebrafish (*Danio rerio*) lines used for this study were: *UAS:GCaMP6s<sup>sq205</sup>*, *SqKR11Et*  
381 *[2]*, *sqKR4Et [64]*, *GAL4s1011t [65]*, *GAL4s1020t [65]*, *UAS:GCaMP3<sup>sq200</sup>*,  
382 *elavl3:GCaMP6f<sup>12200</sup>*, *UAS:ChR2-eYFP [66]*, *gad1b:DsRed [36]*, *vGlut2a:GAL4 [36]*,  
383 *UAS:eGFP*, *UAS:GtACR1 [55]*, *UAS:GtACR2 [55]*, *elavl3:GCaMP6f* (Wolf et al, in  
384 press) and AB wildtype.

## 385 **Imaging**

386 Zebrafish larvae were anaesthetized in mivacurium and embedded in low-melting  
387 temperature agarose (1.2-2.0 % in E3; egg water: 5 mM NaCl, 0.17 mM KCl, 0.33  
388 mM CaCl<sub>2</sub>, 0.33 mM MgSO<sub>4</sub>) in a glass-bottom dish (Mat Tek). They were imaged  
389 on a Nikon two-photon microscope (A1RMP), attached to a fixed stage upright  
390 microscope, using a 25x water immersion objective (NA = 1.1). The femtosecond  
391 laser (Coherent Vision II) was tuned to 920 nm for GCaMP imaging. Stacks were  
392 collected in resonant-scanning mode with a 525/50 nm bandpass emission filter and  
393 with 8x pixel averaging; single-plane images were collected in galvano-scanning  
394 mode with 2x pixel averaging.



395 Light stimuli were generated by 5 mm blue LEDs (458 nm peak emission). They were  
396 powered by a 5 V TTL signal from a control computer and synchronized with image  
397 capture using a National Instruments DAQ board, controlled by the Nikon Elements  
398 software. Light intensity at the sample was  $0.13 \text{ mW/cm}^2$ .

399 For widefield microscopy, excitation was provided by LEDs (Cairn OptoLED) at 470  
400 nm. Images were captured on a Zeiss Axio Examiner with a 20x water immersion  
401 objective, using a Flash4 camera (Hamamatsu) controlled by MetaMorph. After  
402 background subtraction, change in fluorescence was measured using MetaMorph.

### 403 **Image data analysis**

404 **Initial Data Preprocessing:** Data was analysed using custom written codes in  
405 Python. Raw images obtained were first registered using cross-correlation to correct  
406 for any vertical/horizontal movement artifacts. Then, a median spatial filter of size 3  
407 was applied to remove spatial noise. A darker region outside the fish was chosen as  
408 the background and subtracted from the image to remove any signal that did not  
409 arise from GCaMP fluorescence. Non linear trends in the data were detrended using  
410 polynomials of order 2-3.

411 **Pixel based analysis in single fish:** In order to look at the overall spatial distribution  
412 of responses, which included both neuropils and cells, we performed clustering via *K-*  
413 *means* using the Thunder platform [67]. Data here were normalized into Z-scores by  
414 subtracting the overall mean and dividing by the standard deviation of each pixel over  
415 time and smoothed with a rolling window. Since pixel based analysis are sensitive to  
416 noise, and neighboring pixels with the same response could have varying standard  
417 deviation (in case of cell segmentation, pixels forming an ROI are averaged to obtain  
418 its intensity value), z-scores that account for both mean and standard deviation were  
419 used. Clusters obtained using pixel-based k-means analysis also provided the basis

420 for the type of responses we looked for in segmented neurons.

421 ***K-means***: *K-means* clustering was performed to identify pixels with similar  
422 responses profiles. This algorithm classifies the pixels into clusters, where the  
423 number of clusters,  $k$ , is chosen by the user. The end results are  $k$  cluster centers  
424 and labelling of pixels that belong to each cluster. Given the uncertainty of the  
425 optimal cluster number, an iterative approach was used to separate pixels relating to  
426 evoked responses versus pixels that do not (here referred to as independent  
427 clusters). The number of clusters were chosen to reveal as many stimulus related  
428 clusters as possible, until there was little change in the number and types of stimulus  
429 related clusters and increase in independent clusters. In normal fish, clusters related  
430 to evoked activity were easy to obtain. Clusters that are stimulus-independent were  
431 removed from the spatial and temporal plots for clarity. Examples of such clusters are  
432 shown in Fig. S2 (Additional File 8). In all cases, *K-means* cluster centers showing  
433 evoked responses to light ON were colored in shades of blue and those showing  
434 responses to light OFF were colored in shades of red. Pixels belonging to the cluster  
435 were colored similarly and superimposed on an average image of the plane  
436 analysed. In different datasets (Fig. 1d-e, Fig. 4a-f, 4n-o and 5c-e), this analysis  
437 provided an optimal  $k$  of 6-10. The 2-4 clusters that did not correspond to evoked  
438 activity were not included while plotting.

439 **Cell Segmentation**: Cells were manually segmented in ImageJ. The average  
440 intensity of pixels within an ROI across time were saved for further analysis.  $\Delta F/F_0$  of  
441 the temporal traces were calculated by subtracting and then dividing by the mean of  
442 the total fluorescence during a baseline period (usually 10 seconds before first  
443 stimulus). A rolling window average was performed to smooth traces.

444 **Classifying responses:** Pixel based *K-means* analysis revealed many categories of  
445 responses to changes in irradiance. Using that as a basis, temporal traces from the  
446 cells were first broadly classified as those responding to light ON or light OFF. This  
447 was done by calculating their correlation coefficient to a square wave that is 1 when  
448 the light is ON or when light is OFF and 0 during other time periods. High correlation  
449 to these traces indicated that the pixel or cell is responding to light ON or OFF  
450 respectively (from multiple runs, a correlation coefficient of 0.4 and above seemed to  
451 provide accurate classification). Inspecting the cell traces in the ON and OFF  
452 categories revealed further classifications that could be made based on time of  
453 response (transient or sustained) and direction of response (excitatory or inhibitory).  
454 Cells responding transiently to both ON and OFF were also found. The temporal  
455 traces from the many categories in individual fish are plotted as heatmaps (for  
456 example, Fig. 2a, 4g). In experiments looking for the presence or absence of activity  
457 (effects of anterior thalamus neuropil ablation, parapineal ablation, enucleation, red  
458 vs blue response), the broad categories of ON and OFF were used. Spatial  
459 distribution of these categories are also plotted (for example, Fig. 2b, 4h).

460 **Neuropil responses:** Similar to the cell responses, pixels from habenula, thalamic  
461 neuropil and the pineal were similarly classified. Pixels from multiple fish were  
462 overlaid on each other and image transparency was adjusted to view the compiled  
463 response. Since locations of responses were largely similar and different classes  
464 spatially distinct in the neuropil of individual fish, the overlay did not mask any  
465 response.

466 **Boxplots:** Where possible, boxplots were plotted to show the full distribution of the  
467 data. The box in the boxplot ranges from the first quartile to the third quartile, and the  
468 box shows the interquartile range (IQR). The line across the box is the median of the  
469 data. The whiskers extend to  $1.5 \times \text{IQR}$  on either side of the box. Anything above this

470 range are defined as outliers and plotted as black diamonds in the plots.

471 **% of active cells/pixels vs % of cells/pixels** : % of active cell/pixels were  
472 calculated by dividing the number of active cells / neuropil pixels by the total number  
473 of cells / neuropil pixels. These provide an indication of the response across  
474 individual animals and have been shown as boxplots or individual data points.  
475 Histograms, on the other hand, display % of cells/pixels, which are obtained by  
476 dividing number of cells / neuropil pixels with a particular  $\Delta F/F_0$  by the total number of  
477 cells / neuropil pixels.

478 **Statistics:** The Kolmogorov-Smirnov test (KS-test) was used to calculate the  
479 differences in distribution of amplitude or response duration. Histograms are shown  
480 in all cases. For non parametric paired distributions of number of cells, a Wilcoxon  
481 signed rank test was used and a Mann Whitney U test was used for independent  
482 data. Test statistic and p-values are reported.

### 483 **Neural tracing**

484 DiD (Thermo Fisher Scientific) was dissolved in 50  $\mu$ l ethanol to make a saturated  
485 solution. This was heated to 55°C for 5 minutes prior to injection into the fish that had  
486 been fixed in 4% paraformaldehyde. Fish were mounted in 2% low melting  
487 temperature agarose dissolved in PBS. The dye was pressure injected into the  
488 habenula under a compound microscope (Leica DM LFS), using a 20X water  
489 immersion objective. For labeling the retina, a saturated solution of Dil (Thermo  
490 Fisher Scientific) in chloroform was used. Injections were carried out under a  
491 stereomicroscope (Zeiss Stemi 2000). After injections, fish were stored at 4°C  
492 overnight to allow tracing, and then imaged with a 40x water immersion objective on  
493 a Zeiss LSM 710 confocal microscope.

494 CM-DiI (Thermo Fisher Scientific) was dissolved in ethanol (1  $\mu\text{g}/\mu\text{l}$ ). Fish were  
495 mounted in 2% agarose in E3, injected on a compound microscope, then allowed to  
496 recover in E3 at 28°C for 4 hours.

#### 497 **Antibody label**

498 Larvae were fixed in 4% para-formaldehyde/PBS overnight at 4°C. They were then  
499 rinsed in PBS. The brains were dissected out, and permeabilized using 1% BSA  
500 (fraction V; Sigma), 0.1% DMSO and 0.1% Triton X-100. The anti-GAD65/67 (Abcam  
501 ab11070, RRID:AB\_297722; 1:500) has previously been used in zebrafish [2,68].  
502 The brains were incubated in the primary antibody overnight, rinsed several times in  
503 PBS, then incubated in secondary antibody (Alexa 488 goat anti-rabbit; 1:1000). After  
504 washing, these were mounted in 1.2% agarose/PBS. Imaging was carried out using a  
505 Zeiss LSM 800 laser scanning confocal microscope, with a 40x water immersion  
506 objective.

#### 507 **Enucleation**

508 5 day-old fish were anaesthetized in Ringer's saline containing buffered tricaine. The  
509 eyes were removed using electrolytically sharpened tungsten needles. Fish were  
510 allowed to recover for several hours in anesthetic-free saline. Activity was recorded 2  
511 - 4 hours after eye removal. To enable lateral imaging of the thalamus (Fig. 5c,d),  
512 one eye was removed using this method.

#### 513 **Optogenetic stimulation**

514 5 dpf *GAL4s1020t*, *UAS:ChR2-eYFP*, *elavl3:GCaMP6f* larvae were used. All  
515 experiments were performed on fish lacking eyes. Fish were mounted in 1.2%  
516 agarose in Ringer's saline, and imaged using two-photon microscopy as described  
517 above, at 1 Hz. Optical stimulation was carried out using a 50  $\mu\text{m}$  fiber optic probe

518 (Doric Lenses). The probe was held with a pipette holder (UT-2, Narishige), and the  
519 tip was positioned approximately 20  $\mu\text{m}$  from fish, at the level of the thalamus, using  
520 a hanging drop micromanipulator (MO-202U, Narishige). The 465 nm LED (Doric)  
521 was driven with a current of 900 mA, 30 seconds after the start of imaging. 10 pulses  
522 were provided, with a pulse duration of 25 milliseconds and a frequency between 1  
523 and 8 Hz. Each fish was exposed to at least 3 pulse trains. For Fig. 9b-c, the average  
524 of the first 29 frames was used as a reference. The ratio of all frames relative to this  
525 reference was obtained using FIJI (RRID:SCR\_002285). The analysis to generate  
526 Fig. 9g was blind to the genotype.

### 527 **Laser ablation**

528 *elav3:GCaMP6f* larvae were anaesthetized and then mounted in 2% low-melting  
529 temperature agarose. First, the response of dorsal habenula neurons to light pulses  
530 was recorded. Lesions were then created with the femto-second laser tuned to 960  
531 nm and fixed on a single point. Several pulses, each lasting 100 - 500 msec, were  
532 used. Lesioning was monitored by time-lapse imaging GCaMP6f fluorescence before  
533 and after each pulse, and was terminated when a cavitation bubble was seen; this  
534 was visible by simultaneously collecting light at 595 nm. Animals with bleeding in the  
535 brain after lesioning, due to bursting of a blood vessel in the thalamus, were  
536 discarded. The dorsal habenula was then re-imaged at the focal plane that was  
537 initially recorded, as determined by the focus motor, with care taken to ensure that  
538 cell shapes matched.

### 539 **Vertical migration**

540 As described elsewhere [32], six naive larvae were tested simultaneously. Fish were  
541 placed individually in a chamber (3 cm L x 1 cm W x 5 cm H). After 3 min of  
542 adaptation to light and habituation to the chamber, 6 cycles of alternating light/dark

543 were delivered, each consisting of 1 min light ON and 1 min light OFF. A green (24V,  
544 525 nm peak, TMS-lite) or blue (470 nm peak, TMS-lite) LED backlight was the only  
545 visible light source in the incubator. The intensity of the green light was  $3.8 \text{ mW/cm}^2$ ,  
546 while the intensity of blue light was  $6.0 \text{ mW/cm}^2$ , as measured using a Thorlabs light  
547 meter (PM100A and S120VC). Videos were taken at 17 fps, 1096 x 1096 pixel  
548 resolutions, using custom-written Python codes for real-time tracking of the fish  
549 position in the tank. The codes also control a USB3.0 Basler camera (acA2040-  
550 90umNIR) attached with a 1:1.8/4 mm lens (Basler) and a 830 nm longpass filter  
551 (MIDOPT, LP830) for capturing images at the IR range. Four infrared LED bars (850  
552 nm peak TMS-lite) were used for illumination. The LED backlight was controlled by  
553 Python codes driving a microcontroller board (Arduino Uno) connected to a power  
554 supply switch (TMS-lite). The entire experiment for one transgenic line was carried  
555 out in one afternoon (3-6 pm). A total of 57 fish were tested (18 GtACR1, 17 control  
556 siblings, tested at 8 dpf; 10 GtACR2, 12 control siblings, tested at 11 dpf).

557 Expression of GtACR1 or GtACR2 in each fish was determined after the experiment  
558 using a fluorescent stereo microscope. No fish was excluded from analysis. The x-y  
559 coordinate data were analyzed using custom-written macros in Excel (Microsoft). The  
560 correlation coefficient of each fish (Fig.10c, e) was calculated using the *correl*  
561 function in Excel to correlate the vertical position of the fish in the tank (normalized  
562 from 0-bottom to 1-top) with the LED backlight status (0-OFF and 1-ON). To  
563 determine the initial movement of the fish upon each light offset especially when the  
564 fish was in the middle of the tank (defined as between 0.25 and 0.75 in the y-axis),  
565 we calculated the position of the fish at the 6th sec after light offset (i.e after the first  
566 10% of darkness). Upward movement is defined as vertical position at  $t_6 > t_0$  (red  
567 dots in Fig.10d, f) and downward movement is defined as vertical position at  $t_6 < t_0$   
568 (blue dots in Fig.10d, f). Because each fish has more than 1 data point in the 6

569 ON/OFF cycles in Fig.10d, a multilevel analysis was conducted to rule out the nested  
570 cluster (fish). Locomotion was calculated as distance moved by each fish under light  
571 ON and OFF and averaged across 6 cycles.

## 572 **Declarations**

### 573 **Availability of data and material**

574 The code and data used are available in the Figshare repository,  
575 <https://figshare.com/s/68c165f8868eca15cbb9>.

### 576 **Competing interests**

577 The authors declare that they have no competing interests.

### 578 **Funding**

579 This work was supported by core funding from the Institute of Molecular and Cell  
580 Biology and from a Lee Kong Chian School of Medicine, Nanyang Technological  
581 University Start-up grant to SJ. SK and QL were supported by NGS fellowships from  
582 the National University of Singapore.

### 583 **Author contributions**

584 Experiments were designed by CRK, QL and SJ. CRK carried out two-photon  
585 imaging, and optogenetic experiments with anion channelrhodopsins. SK developed  
586 software and analyzed imaging data. QL performed parapineal lesion. CK generated  
587 the *UAS:GCaMP6s* line. SJ performed wide-field imaging and analysis, dye tracing,  
588 antibody label, ChR2 manipulation and wrote the manuscript.

### 589 **Acknowledgements**

590 We thank David Hildebrand and Isaac Bianco for providing the *elav13:GCaMP6f* line,



591 and Claire Wyart for providing the *UAS:ChR2-eYFP* line. The drawing in Fig. 5b was  
592 obtained from [www.uoneuro.uoregon.edu](http://www.uoneuro.uoregon.edu).

## 593 **References**

- 594 1. Stephenson-Jones M, Floros O, Robertson B, Grillner S. Evolutionary  
595 conservation of the habenular nuclei and their circuitry controlling the dopamine and  
596 5-hydroxytryptophan (5-HT) systems. *Proc. Natl. Acad. Sci. U. S. A.* 2012;109:E164–  
597 73.
- 598 2. Lee A, Mathuru AS, Teh C, Kibat C, Korzh V, Penney TB, et al. The habenula  
599 prevents helpless behavior in larval zebrafish. *Curr. Biol.* 2010;20:2211–6.
- 600 3. Agetsuma M, Aizawa H, Aoki T, Nakayama R, Takahoko M, Goto M, et al. The  
601 habenula is crucial for experience-dependent modification of fear responses in  
602 zebrafish. *Nat. Neurosci.* 2010;13:1354–6.
- 603 4. Zhang J, Tan L, Ren Y, Liang J, Lin R, Feng Q, et al. Presynaptic Excitation via  
604 GABAB Receptors in Habenula Cholinergic Neurons Regulates Fear Memory  
605 Expression. *Cell.* 2016;166:716–28.
- 606 5. Matsumoto M, Hikosaka O. Lateral habenula as a source of negative reward  
607 signals in dopamine neurons. *Nature.* 2007;447:1111–5.
- 608 6. Matsumoto M, Hikosaka O. Representation of negative motivational value in the  
609 primate lateral habenula. *Nat. Neurosci.* 2009;12:77–84.
- 610 7. Amo R, Fredes F, Kinoshita M, Aoki R, Aizawa H, Agetsuma M, et al. The  
611 habenulo-raphe serotonergic circuit encodes an aversive expectation value essential  
612 for adaptive active avoidance of danger. *Neuron.* 2014;84:1034–48.
- 613 8. Fowler CD, Lu Q, Johnson PM, Marks MJ, Kenny PJ. Habenular  $\alpha 5$  nicotinic

- 614 receptor subunit signalling controls nicotine intake. *Nature*. 2011;471:597–601.
- 615 9. Aizawa H, Cui W, Tanaka K, Okamoto H. Hyperactivation of the habenula as a link  
616 between depression and sleep disturbance. *Front. Hum. Neurosci.* 2013;7:826.
- 617 10. Chou M-Y, Amo R, Kinoshita M, Cherng B-W, Shimazaki H, Agetsuma M, et al.  
618 Social conflict resolution regulated by two dorsal habenular subregions in zebrafish.  
619 *Science*. 2016;352:87–90.
- 620 11. Golden SA, Heshmati M, Flanigan M, Christoffel DJ, Guise K, Pfau ML, et al.  
621 Basal forebrain projections to the lateral habenula modulate aggression reward.  
622 *Nature*. 2016;534:688–92.
- 623 12. Jhou TC, Fields HL, Baxter MG, Saper CB, Holland PC. The rostromedial  
624 tegmental nucleus (RMTg), a GABAergic afferent to midbrain dopamine neurons,  
625 encodes aversive stimuli and inhibits motor responses. *Neuron*. 2009;61:786–800.
- 626 13. Quina LA, Tempest L, Ng L, Harris JA, Ferguson S, Jhou TC, et al. Efferent  
627 pathways of the mouse lateral habenula. *J. Comp. Neurol.* 2015;523:32–60.
- 628 14. Morley BJ, Spangler KM, Javel E. The development of somatostatin  
629 immunoreactivity in the interpeduncular nucleus of the cat. *Brain Res.* 1985;352:241–  
630 8.
- 631 15. Wang RY, Aghajanian GK. Physiological evidence for habenula as major link  
632 between forebrain and midbrain raphe. *Science*. 1977;197:89–91.
- 633 16. Appelbaum L, Wang GX, Maro GS, Mori R, Tovin A, Marin W, et al. Sleep-wake  
634 regulation and hypocretin-melatonin interaction in zebrafish. *Proc. Natl. Acad. Sci. U.*  
635 *S. A.* 2009;106:21942–7.
- 636 17. Hong S, Hikosaka O. The globus pallidus sends reward-related signals to the

- 637 lateral habenula. *Neuron*. 2008;60:720–9.
- 638 18. Dreosti E, Vendrell Llopis N, Carl M, Yaksi E, Wilson SW. Left-right asymmetry is  
639 required for the habenulae to respond to both visual and olfactory stimuli. *Curr. Biol*.  
640 2014;24:440–5.
- 641 19. Krishnan S, Mathuru AS, Kibat C, Rahman M, Lupton CE, Stewart J, et al. The  
642 right dorsal habenula limits attraction to an odor in zebrafish. *Curr. Biol*.  
643 2014;24:1167–75.
- 644 20. Miyasaka N, Morimoto K, Tsubokawa T, Higashijima S-I, Okamoto H, Yoshihara  
645 Y. From the olfactory bulb to higher brain centers: genetic visualization of secondary  
646 olfactory pathways in zebrafish. *J. Neurosci*. 2009;29:4756–67.
- 647 21. Zhao H, Rusak B. Circadian firing-rate rhythms and light responses of rat  
648 habenular nucleus neurons in vivo and in vitro. *Neuroscience*. 2005;132:519–28.
- 649 22. Sakhi K, Wegner S, Belle MDC, Howarth M, Delagrangé P, Brown TM, et al.  
650 Intrinsic and extrinsic cues regulate the daily profile of mouse lateral habenula  
651 neuronal activity. *J. Physiol*. 2014;592:5025–45.
- 652 23. Semm P, Demaine C. Electrophysiology of the pigeon’s habenular nuclei:  
653 evidence for pineal connections and input from the visual system. *Brain Res. Bull*.  
654 1984;12:115–21.
- 655 24. Bianco IH, Engert F. Visuomotor transformations underlying hunting behavior in  
656 zebrafish. *Curr. Biol*. 2015;25:831–46.
- 657 25. Amo R, Aizawa H, Takahoko M, Kobayashi M, Takahashi R, Aoki T, et al.  
658 Identification of the zebrafish ventral habenula as a homolog of the mammalian  
659 lateral habenula. *J. Neurosci*. 2010;30:1566–74.

- 660 26. Burrill JD, Easter SS Jr. Development of the retinofugal projections in the  
661 embryonic and larval zebrafish (*Brachydanio rerio*). *J. Comp. Neurol.* 1994;346:583–  
662 600.
- 663 27. Robles E, Laurell E, Baier H. The retinal projectome reveals brain-area-specific  
664 visual representations generated by ganglion cell diversity. *Curr. Biol.* 2014;24:2085–  
665 96.
- 666 28. Turner KJ, Hawkins TA, Yáñez J, Anadón R, Wilson SW, Folgueira M. Afferent  
667 Connectivity of the Zebrafish Habenulae. *Front. Neural Circuits.* 2016;10:30.
- 668 29. Butler AB, Saidel WM. Clustered phylogenetic distribution of nucleus  
669 rostromedialis among ray-finned fishes. *Brain Behav. Evol.* 2003;62:152–67.
- 670 30. Saidel WM. Nucleus rostromedialis: an expansion of the epithalamus in some  
671 actinopterygii. *Anat. Rec.* . 2013;296:1594–602.
- 672 31. Hendricks M, Jesuthasan S. Asymmetric innervation of the habenula in zebrafish.  
673 *J. Comp. Neurol.* 2007;502:611–9.
- 674 32. Lin Q, Jesuthasan SJ. Masking of a circadian behavior in larval zebrafish involves  
675 the thalamo-habenula pathway. *Scientific Reports.* 2017;7:4104.
- 676 33. Chen T-W, Wardill TJ, Sun Y, Pulver SR, Renninger SL, Baohan A, et al.  
677 Ultrasensitive fluorescent proteins for imaging neuronal activity. *Nature.*  
678 2013;499:295–300.
- 679 34. Mueller T. What is the Thalamus in Zebrafish? *Front. Neurosci.* 2012;6:64.
- 680 35. Sherman SM, Guillery RW. The role of the thalamus in the flow of information to  
681 the cortex. *Philos. Trans. R. Soc. Lond. B Biol. Sci.* 2002;357:1695–708.

- 682 36. Satou C, Kimura Y, Hirata H, Suster ML, Kawakami K, Higashijima S-I.  
683 Transgenic tools to characterize neuronal properties of discrete populations of  
684 zebrafish neurons. *Development*. 2013;140:3927–31.
- 685 37. Moore RY, Speh JC. GABA is the principal neurotransmitter of the circadian  
686 system. *Neurosci. Lett*. 1993;150:112–6.
- 687 38. Venugopalan V, Guerra A 3rd, Nahen K, Vogel A. Role of laser-induced plasma  
688 formation in pulsed cellular microsurgery and micromanipulation. *Phys. Rev. Lett*.  
689 2002;88:078103.
- 690 39. Vogel A, Noack J, Hüttman G, Paltauf G. Mechanisms of femtosecond laser  
691 nanosurgery of cells and tissues. *Appl. Phys. B*. 2005;81:1015–47.
- 692 40. Govorunova EG, Sineshchekov OA, Janz R, Liu X, Spudich JL.  
693 NEUROSCIENCE. Natural light-gated anion channels: A family of microbial  
694 rhodopsins for advanced optogenetics. *Science*. 2015;349:647–50.
- 695 41. Mohamed GA, Cheng RK, Ho J, Krishnan S, Mohammad F, Claridge-  
696 Chang A, Jesuthasan S. Optical inhibition of zebrafish behavior with anion  
697 channelrhodopsins. *bioRxiv*. 2017; doi:10.1101/158899
- 698 42. Takeuchi T, Duszkiwicz AJ, Sonneborn A, Spooner PA, Yamasaki M, Watanabe  
699 M, et al. Locus coeruleus and dopaminergic consolidation of everyday memory.  
700 *Nature*. 2016;537:357–62.
- 701 43. Raimondo JV, Kay L, Ellender TJ, Akerman CJ. Optogenetic silencing strategies  
702 differ in their effects on inhibitory synaptic transmission. *Nat. Neurosci*.  
703 2012;15:1102–4.
- 704 44. Fernandes AM, Fero K, Arrenberg AB, Bergeron SA, Driever W, Burgess HA.

- 705 Deep brain photoreceptors control light-seeking behavior in zebrafish larvae. *Curr.*  
706 *Biol.* 2012;22:2042–7.
- 707 45. Aarts E, Verhage M, Veenvliet JV, Dolan CV, van der Sluis S. A solution to  
708 dependency: using multilevel analysis to accommodate nested data. *Nat. Neurosci.*  
709 2014;17:491–6.
- 710 46. Warp E, Agarwal G, Wyart C, Friedmann D, Oldfield CS, Conner A, et al.  
711 Emergence of patterned activity in the developing zebrafish spinal cord. *Curr. Biol.*  
712 2012;22:93–102.
- 713 47. Yáñez J, Busch J, Anadón R, Meissl H. Pineal projections in the zebrafish (*Danio*  
714 *rerio*): overlap with retinal and cerebellar projections. *Neuroscience.* 2009;164:1712–  
715 20.
- 716 48. Jetti SK, Vendrell-Llopis N, Yaksi E. Spontaneous activity governs olfactory  
717 representations in spatially organized habenular microcircuits. *Curr. Biol.*  
718 2014;24:434–9.
- 719 49. Steenbergen PJ, Richardson MK, Champagne DL. Patterns of avoidance  
720 behaviours in the light/dark preference test in young juvenile zebrafish: a  
721 pharmacological study. *Behav. Brain Res.* 2011;222:15–25.
- 722 50. Saidel WM, Butler AB. Retinal projections in the freshwater butterfly fish,  
723 *Pantodon buchholzi* (Osteoglossoidei). II. Differential projections of the dorsal and  
724 ventral hemiretinas. *Brain Behav. Evol.* 1991;38:154–68.
- 725 51. Zhang B-B, Yao Y-Y, Zhang H-F, Kawakami K, Du J-L. Left Habenula Mediates  
726 Light-Preference Behavior in Zebrafish via an Asymmetrical Visual Pathway. *Neuron.*  
727 2017;93:914–28.e4.

- 728 52. Mueller T, Guo S. The distribution of GAD67-mRNA in the adult zebrafish  
729 (teleost) forebrain reveals a prosomeric pattern and suggests previously unidentified  
730 homologies to tetrapods. *J. Comp. Neurol.* 2009;516:553–68.
- 731 53. Hattar S, Kumar M, Park A, Tong P, Tung J, Yau K-W, et al. Central projections  
732 of melanopsin-expressing retinal ganglion cells in the mouse. *J. Comp. Neurol.*  
733 2006;497:326–49.
- 734 54. Morin LP, Studholme KM. Retinofugal projections in the mouse. *J. Comp. Neurol.*  
735 2014;522:3733–53.
- 736 55. Mohamed GA, Cheng R-K, Ho J, Krishnan S, Mohammad F, Claridge-Chang A,  
737 et al. Optical inhibition of zebrafish behavior with anion channelrhodopsins [Internet].  
738 bioRxiv. 2017. Available from: <http://dx.doi.org/10.1101/158899>
- 739 56. Díaz C, Puelles L. Afferent connections of the habenular complex in the lizard  
740 *Gallotia galloti*. *Brain Behav. Evol.* 1992;39:312–24.
- 741 57. Kemali M, Guglielmotti V, Gioffré D. Neuroanatomical identification of the frog  
742 habenular connections using peroxidase (HRP). *Exp. Brain Res.* 1980;38:341–7.
- 743 58. Marburg O. The structure and fiber connections of the human habenula. *J. Comp.*  
744 *Neurol.* 1944;80:211–33.
- 745 59. Cragg BG. The connections of the habenula in the rabbit. *Exp. Neurol.*  
746 1961;3:388–409.
- 747 60. Moore RY, Weis R, Moga MM. Efferent projections of the intergeniculate leaflet  
748 and the ventral lateral geniculate nucleus in the rat. *J. Comp. Neurol.* 2000;420:398–  
749 418.
- 750 61. Oh SW, Harris JA, Ng L, Winslow B, Cain N, Mihalas S, et al. A mesoscale

- 751 connectome of the mouse brain. *Nature*. 2014;508:207–14.
- 752 62. Ely BA, Xu J, Goodman WK, Lapidus KA, Gabbay V, Stern ER. Resting-state  
753 functional connectivity of the human habenula in healthy individuals: Associations  
754 with subclinical depression. *Hum. Brain Mapp*. 2016;37:2369–84.
- 755 63. Torrisi S, Nord CL, Balderston NL, Roiser JP, Grillon C, Ernst M. Resting state  
756 connectivity of the human habenula at ultra-high field. *Neuroimage*. 2017;147:872–9.
- 757 64. Teh C, Chudakov DM, Poon K-L, Mamedov IZ, Sek J-Y, Shidlovsky K, et al.  
758 Optogenetic in vivo cell manipulation in KillerRed-expressing zebrafish transgenics.  
759 *BMC Dev. Biol*. 2010;10:110.
- 760 65. Baier H, Scott EK. Genetic and optical targeting of neural circuits and behavior--  
761 zebrafish in the spotlight. *Curr. Opin. Neurobiol*. 2009;19:553–60.
- 762 66. Arrenberg AB, Del Bene F, Baier H. Optical control of zebrafish behavior with  
763 halorhodopsin. *Proc. Natl. Acad. Sci. U. S. A*. 2009;106:17968–73.
- 764 67. Freeman J, Vladimirov N, Kawashima T, Mu Y, Sofroniew NJ, Bennett DV, et al.  
765 Mapping brain activity at scale with cluster computing. *Nat. Methods*. 2014;11:941–  
766 50.
- 767 68. Wyart C, Del Bene F, Warp E, Scott EK, Trauner D, Baier H, et al. Optogenetic  
768 dissection of a behavioural module in the vertebrate spinal cord. *Nature*.  
769 2009;461:407–10.

## 770 **Figure legends**

### 771 *Fig. 1 Overview of the habenula response to onset and offset of light*

772 **a, b** Dorsal view of the fore and midbrain of 5 day old *elav13:CaMP6f* fish, imaged



773 with widefield fluorescence microscopy at 200 Hz. The time since start of illumination  
774 is shown at the top right. The wedge indicates the ratio of fluorescence relative to the  
775 first frame. There is an increase in GCaMP6f fluorescence in the left habenula  
776 (arrowhead in b). **c.** Maximum  $\Delta F/F_0$  value in the left and right habenula after onset  
777 of light in five different fish. Each circle is one fish and the line joins data points from  
778 the same fish. **d-f** Two photon imaging of the habenula in a 7dpf *GAL4s1011t*,  
779 *UAS:GCaMP6s* fish, at 13 Hz. **d** Average of the time-lapse sequence, showing  
780 anatomy. The dorsal left neuropil is indicated by the yellow arrowhead. **e** Spatial  
781 distribution of responses to pulses of light. Pixels are color-coded according to the  
782 temporal pattern of response, as indicated in panel f. **f** Centers of clusters obtained  
783 from running *K-means* on the time series of pixels in panel d. Cluster centers are  
784 colored in shades of blue for responses to light onset (On) and magenta and orange  
785 for responses to light offset (Off). The presence of light is indicated by the blue bars.  
786 **g, h** Neuropil response summarized from imaging 10 fish exposed to 7 pulses of blue  
787 light. **g** Pixels in the left neuropil from all fish could be classified into three main  
788 classes. They are pseudocolored and overlaid on an average image of a 6 dpf fish.  
789 The largest response was a transient response to light on (blue). A sustained  
790 response to light On (cyan) and Off (magenta) were also seen. Responses were  
791 reproducible in all ten fish. **h** Average traces obtained from neuropil pixels, shown  
792 here for two pulses of light. **i** Percentage of cells active to light On and Off in the  
793 habenula is correlated with the percentage of active pixels in neuropil. The transient  
794 and sustained neuropil responses were combined into ON. Percentage of active cells  
795 or pixels were calculated by dividing the number of cells/pixels active to the stimulus  
796 by the total number of segmented cells or neuropil pixels. Each circle per category is  
797 one fish. The bold lines show best fit (linear regression). *r* is the correlation  
798 coefficient. **j-k** Cumulative probability of peak  $\Delta F/F_0$  response in cells and neuropil

799 pixels responding to light On (j) and light Off (k). The response in the neuropil  
800 precedes the response in cells. P-value and test statistic (D) were obtained by a KS  
801 test between categories in the first 5 seconds. In panel j, the dark gray \* (left) is the  
802 result of comparison between neuropil transient On and cell On, while light gray \*  
803 (right) between neuropil sustained On and cell On. rHb: right habenula; lHb: left  
804 habenula. Pa: pallium; OT: optic tectum. a: anterior; p: posterior. Scale bar = 25  $\mu$ m.

805 **Fig. 2 Response of habenula neurons to pulses of light**

806 **a-d** The dorsal habenula response to 7 pulses of blue light in n=10 fish (*GAL4s1011t*,  
807 *UAS:GCaMP6s*, 5-7 dpf). **a** Heatmaps from 5 example fish showing responses in  
808 cells that were classified as On, Off or Inhibitory (Inh). The colors indicate  $\Delta F/F_0$ , as  
809 shown in the colorbar. Responses in each fish are sorted in ascending order of mean  
810  $\Delta F/F_0$ . Black horizontal lines separate each fish. The bold vertical lines correspond to  
811 light onset while the dashed lines indicate offset. The presence of light is also  
812 indicated by the blue bars. The height of the heatmaps represent the number of cells  
813 as indicated by the vertical scale bar. **b** Overlay of cells segmented from all fish. A  
814 small circle was drawn around the centroid of the segmented cell. Three main  
815 classes of activity are shown. Blue indicates cells responding to light ON (ON), green  
816 cells are inhibited by light (Inh) and magenta cells are activated in the absence of  
817 light (OFF). Hollow circles did not show an evoked response. The gap in the left  
818 habenula indicates the neuropil region. **c** Averaged traces from the cells in panel b,  
819 showing the response of different classes for the first two pulses of light. **d** Boxplots  
820 showing distribution of cells responding to different classes in the left and right  
821 habenula. Each circle is one fish and the line joins data points from the same fish. **e**

822 K-means clustering of pixels in the habenula of fish from 5-10 dpf as indicated. Pixels  
823 are colored blue if they respond to light ON and magenta if they respond to light OFF.  
824 Data from each fish was analysed separately. Individual traces of the cluster  
825 centroids are not shown here but are similar to Fig. 1f. All fish have a response to  
826 light onset in the dorsal left neuropil.

827 ***Fig. 3 Anatomical characterization of thalamic neurons projecting to the habenula***

828 **a** An example of DiD injection (cyan) into the dorsal neuropil of the left habenula  
829 (yellow arrowhead). The dorsal neuropil of the right habenula contains afferents from  
830 the entopeduncular nucleus (labelled by the SqKR11Et line; magenta) and has no  
831 DiD labelled neurons, indicating specificity of the injection. **b** Dorsal view of the  
832 thalamic region of a 7 day old fish following DiD injection into the dorsal left habenula  
833 neuropil. Arrowheads indicate retrogradely DiD-labelled neurons that express eGFP  
834 (shown in yellow) under the control of the vGlut2a GAL4 driver. **c** Lateral view of the  
835 fish in panel b, showing DiD labelled neurons on the right side of the brain. **d** Dorsal  
836 view of another larva, in which the dorsal right habenula had been injected with DiD.  
837 Retrogradely labelled neurons are located in the entopeduncular nucleus. **e** A double  
838 transgenic fish, with glutamatergic neurons shown in green, and GABAergic neurons  
839 shown in magenta. The neuropil in the anterior thalamus (arrow) contains magenta  
840 label (e''), indicating the presence of GABAergic fibers. **f** Lateral view of a 7 dpf larva  
841 following injection of CM-Dil into the dorsal left habenula and labelling with anti GAD  
842 65/67. The region of the neuropil containing CM-Dil labeled neurites (red;  
843 arrowheads; f'') is labelled with the GAD65/67 antibody (cyan; f'). All panels except **c**  
844 are single optical sections. Pa: pallium; rHb: right habenula; lHb: left habenula; fr:  
845 fasciculus retroflexus; Th: thalamus. EN: entopeduncular nucleus; OT: optic tectum;  
846 otr: optic tract; ZLI: zona limitans intrathalamica. Scale bar = 25  $\mu$ m. a: anterior; p:  
847 posterior; d: dorsal; v: ventral.

848 **Fig. 4 The response of thalamic neurons to irradiance change.**

849 **a-e** Activity in five different focal planes of a 5-day-old fish expressing GCaMP6s in  
850 thalamic neurons (arrows). Numbers indicate depth. The colours represent K-means  
851 cluster centers shown in panel **f**, with blue indicating ON responses and magenta  
852 indicating OFF responses; cyan pixels have a response to ON and OFF. **g-j**  
853 Quantitative analysis of response of anterior thalamic neurons of *GAL4s1020t*,  
854 *UAS:GCaMP6s* fish (5-6 dpf) to pulses of blue light. Note that this driver is not  
855 expressed in afferent retinal ganglion cells. **g**. Responses in cells from 10 fish at  
856 three different focal planes. Four pulses of blue light were given and imaging was  
857 done at 7 Hz. **g**. Heatmaps of individual cells in five example fish, showing major  
858 classes of responses seen in thalamic neurons: excitation to light ON, light OFF, or  
859 both ON and OFF (yellow). **g** and **g'** have different scales. **h**. Segmented cells in all  
860 fish overlaid and colored by their response. **i**. Traces showing mean responses of  
861 cells in panel **h** for two blue pulses. **j** Percentage of cells responding to light ON, OFF  
862 or both ON and OFF. **k**. Neuropil responses to pulses of light. Pixels with different  
863 response classes from all fish were pseudo-colored and overlaid on an average  
864 image from a 5dpf, *GAL4s1020t*, *UAS:GCaMP6s* fish. **l** Average traces of responses  
865 in panel **k**. **m**. Percentage of neuropil pixels responding to light ON, OFF or to both  
866 ON and OFF. **n-r** Thalamus response to blue and red light. **n**. Spatial distribution of  
867 responses, color coded according to the *k-means* cluster centers in panel **o**, with  
868 blue pixels showing a sustained response to light ON, while magenta pixels and  
869 orange pixels are a mixture of responses to both ON and OFF. **Z** is the Z-score. **p**.  
870 Heatmaps of cells responding to 3 pulses of blue light followed by 3 pulses of red  
871 light in n=6 *GAL4s1020t*, *UAS:GCaMP6s* fish. Cells were classified as responding to  
872 light ON or OFF. While the same cells responded to both blue and red light, the  
873 amplitude of responses were lower to red light. **q**. Peak amplitude of response during

874 light ON and OFF is higher to blue light than red light. Each circle represents one fish  
875 and lines join data points from the same fish. Crosses and diamonds represent  
876 median amplitude. **r.** Histogram showing amplitude of responses during blue (blue  
877 traces) and red (red traces) light ON (left panel) and OFF (right panel). Each trace is  
878 response distribution from all cells in a single fish. P-values and test statistic (D) were  
879 obtained using KS-Test on cumulative response distribution from all fish shown in the  
880 inset in **r.** Th:Thalamus.

881 **Fig. 5 Anatomical and physiological characterization of the anterior thalamic**  
882 **neuropil**

883 **a.** Lateral view of a 6 day old fish following injection of DiD (cyan) into the dorsal  
884 neuropil of the left habenula and Dil (yellow) into the right retina. Arrows indicate  
885 terminals from retinal ganglion cells in the vicinity of fibers from habenula afferents.  
886 See Movie 5. **b** Illustration of a fish larvae, showing the region imaged in panel a (red  
887 box) and in panels c and d (black box). **c-h** Response in the anterior thalamic  
888 neuropil to pulses of light. **c** Average projection of a lateral view of an  
889 *elavl3:GCaMP6f* fish, showing the thalamic neuropil (arrowhead). **d, e** The response  
890 to four pulses of blue light. Colours show the *K-means* cluster centers represented in  
891 panel e. The regions responding to light ON and light OFF are distinct in the thalamic  
892 neuropil. Responses can also be seen in the habenula. **f-h** Quantitation of the  
893 anterior thalamus neuropil response to light pulses in 8 fish. **f** Contours show a  
894 bivariate kernel density estimate of neuropil pixel location for responses to ON  
895 (shades of blue) and OFF (shades of red) of blue light in n=8 fish. The two variables  
896 here are x and y of neuropil pixels. The orientation is same as panel d. Crosses  
897 indicate median location of response to light ON, while diamonds indicate median  
898 location of response to light OFF in each fish. The dorso-ventral and anterior-

899 posterior positions of the median centers are shown in panels **g** and **h** respectively.  
900 Each circle is one fish and lines join data points from the same fish. These panels  
901 show that ON and OFF responses have a different location, with OFF responses in a  
902 more anterior-ventral location. Scale bar = 25  $\mu$ m. P-values and test statistic (D) were  
903 obtained using KS-Test on cumulative distribution of pixel location to light ON and  
904 OFF from all fish. a: anterior; p: posterior; d: dorsal; v: ventral. Hb: Habenula.

905 *Fig. 6 Effect of eye removal on thalamus response to light ON and OFF*

906 **a-i** Activity in the thalamus in response to pulses of blue light in control (n = 3) and  
907 enucleated (n = 4) fish. **a,b** Heatmaps showing activity in individual cells in control  
908 and enucleated fish classified as having response to light ON or OFF. **c** A  
909 comparison of the percentage of active cells in control and enucleated fish. The  
910 response to light ON is reduced in fish lacking eyes, while the response to light OFF  
911 is comparable to controls. **d-e**. Histogram of mean response amplitude in cells in  
912 control and enucleated fish during (d) light ON and (e) OFF. Each trace is one fish.  
913 The amplitude of response to light ON is reduced in enucleated fish. Insets show  
914 cumulative histogram from all fish. **f-i** Pixels in the anterior thalamic neuropil of  
915 control (f) and enucleated (h) fish, that are active to light ON (cyan) or OFF (pink),  
916 were combined and overlaid. Panels f and h show a dorsal view of the thalamus. The  
917 average traces from the colored pixels in f and h are shown in g and i respectively.  
918 Control fish have a response to light ON and OFF, whereas enucleated fish only  
919 have a response to light OFF. **j** Percentage of active neuropil pixels in control and  
920 enucleated fish. **k-l** Cumulative probability of mean response amplitude in pixels of  
921 control and enucleated animals to light ON (k) and light OFF (l). Mean response  
922 during light OFF is not significantly different in enucleated and control fish. **m** Dorsal  
923 view of a 6 day old fish, following injection of DiD into the dorsal left habenula  
924 neuropil and CM-Dil into the pineal organ. See movie 6 for the complete z-stack. **n**

925 Lateral view of the right side of a 6 day old fish, showing anterogradely labeled fibers  
926 from the pineal (red) and retrogradely labeled fibers from the habenula (cyan). The  
927 arrow indicates a pineal axon in the neuropil of the anterior thalamus. **o, p** Response  
928 in the pineal organ to pulses of blue light (n=4 fish). Only OFF responses can be  
929 detected. (o) Pixels showing OFF responses are combined from all fish and overlaid.  
930 (p) Average trace from the colored pixels. The habenula is shown here for orientation  
931 only; habenula neuron responses have been masked. **q-s** Responses in the  
932 habenula to light OFF in control (q) and enucleated (r) fish (*GAL4s1011t*,  
933 *UAS:GCaMP6s*, n=4 fish). Each row in the heat maps represents an individual cell. **s**  
934 Percentage of cells showing an OFF response. Each circle is one fish and lines join  
935 data points from same fish before and after enucleation. Although reduced in  
936 number, there are still cells that display an OFF response. D-statistic and p-values in  
937 panels d, e, k and l were obtained using the KS test on response amplitude  
938 distribution. Panels f, h, m and o are single optical sections; n is a projection  
939 spanning 19.25  $\mu\text{m}$ . rHb:right habenula; lHb: left habenula; Th: thalamus; a: anterior;  
940 p: posterior; d: dorsal; v: ventral. Scale bar = 25  $\mu\text{m}$ .

941 **Fig. 7 The effect of lesioning the anterior thalamic neuropil on habenula response**  
942 **to light.**

943 **a** Dorsal view of an *elav13:GCaMP6f* fish, showing lesion bubbles in the anterior  
944 thalamic neuropil created by a femtosecond laser (arrows). The bubble reflects the  
945 two photon laser, and is thus captured in a separate channel from GCaMP6f  
946 fluorescence. **a',a''** Close-up of the anterior thalamus neuropil before (a') and during  
947 (a'') lesion. The cavity has not yet formed. **b** Heat map showing habenula cell  
948 responses before (left) and after (right) lesioning in 3 fish. **c, d** The cells segmented  
949 from all 3 fish are drawn as circles and overlaid. Responding cells before and after

950 lesion are colored as indicated. **e, f** Histogram showing distribution of mean intensity  
951 in habenula neurons during light ON (e) and OFF (f) before and after lesion. Insets  
952 show cumulative distribution from all fish. P-values and test statistic were obtained  
953 using the KS-test. **g** Comparison of percentage of cells responding to light ON and  
954 OFF before and after lesion. Each circle is one fish and lines join data points from the  
955 same fish. a: anterior; p: posterior; Images are all single optical sections. Scale bar =  
956 25  $\mu\text{m}$ .

957 **Fig. 8 *GtACR1* expression in the thalamus disrupts habenula response to light ON**  
958 **and OFF**

959 **a** A 6 day old fish expressing *GtACR1*-eYFP under the control of the *GAL4s1020t*  
960 driver. *GtACR1*-expressing cells in the anterior thalamus (colored orange-purple) are  
961 indicated by the yellow arrowheads. Puncta of *GtACR1*-eYFP are visible. There is a  
962 low level of *GCaMP6f* expression, shown in green here. **b** A more dorsal focal plane,  
963 with habenula afferents labelled by the *sqKR11Et* line (magenta). *GtACR1*-eYFP  
964 puncta are indicated by the arrowheads. The asterisks indicate autofluorescent  
965 pigment cells. **c-k** Comparison of dorsal left habenula neuropil response to pulses of  
966 blue light, in controls and fish expressing *GtACR1* in the thalamus. **c,d** Response in  
967 the neuropil of control (**c**;  $n = 7$ ) and *GtACR1* expressing siblings (**d**;  $n = 11$ ). -Blue  
968 represents fast ON, cyan represents slow ON, whereas magenta represents OFF  
969 response. **e,f** The average of the colored pixels from c and d respectively.. Shaded  
970 areas show 95% confidence intervals. **g,h** Boxplots show the distribution of  
971 percentage of neuropil pixels showing a response to light ON or OFF in fish  
972 expressing *GtACR1* (h) or control siblings (g). Each circle is one fish and lines join  
973 data points from same fish. P-values and test statistic are obtained using Mann-  
974 Whitney U test between the distribution of pixels in control and *GtACR1* fish of the



975 same response class. **i,j** Histograms showing neuropil response to light ON and OFF  
976 in individual fish expressing GtACR1 (j) and control siblings (i). There is a leftward  
977 shift in the distribution for response to light ON in GtACR1 fish. **k** Interpolations of the  
978 histograms in panels i-j using a smoothing spline fit to show the overall distribution  
979 per category. Pa: pallium; Th: thalamus; hc: habenula commissure; rHb: right  
980 habenula; lHb: left habenula; a: anterior; p: posterior.

981 **Fig. 9 Effect of optogenetic stimulation of the thalamus on habenula activity.**

982 **a** Expression of ChR2-eYFP in the thalamus (arrowheads) of a 5 day old  
983 *GAL4s1020t, UAS:ChR2-eYFP, elav13:GCaMP6f* fish. **b, c** Activity in the habenula of  
984 a ChR2-expressing fish, with (b) and without (c) blue LED stimulation of the  
985 thalamus. The images show the maximum projections of  $F/F_0$  images for a 25-  
986 second period after blue LED illumination, following subtraction of maximum  
987 projections of the period before illumination (i.e. difference in activity before and after  
988 stimulation). **d-f** Heatmaps showing temporal activity from habenula neurons  
989 segmented in fish with (e-f) and without (d) ChR2. In panels e (n = 3 fish) and f (n = 2  
990 fish), blue light pulse was given at the time indicated by the black dashed line and at  
991 a frequency specified. **g**. Cumulative distribution of mean response amplitude, 10  
992 seconds after stimulation in ChR2-expressing and control fish and a randomly  
993 chosen 10 second period in fish with no stimulation. All stimulation frequencies were  
994 combined. The fish with ChR2 show increased  $\Delta F/F_0$  after optogenetic  
995 stimulation. Test statistic and p-values were obtained using KS-test. The gray \*  
996 (bottom) is the result of comparison between control siblings and Chr2-expressing  
997 fish, while the black \* (top) is between no stimulation and Chr2-expressing fish. **h**

998 Mean amplitude before and after optogenetic stimulation at different frequencies.  
999 Each square stands for a stimulus trial. Scale bar = 25  $\mu$ m. Pa: pallium, a: anterior,  
1000 p:posterior, lHb: left habenula, rHb: right habenula.

1001 *Fig. 10 Anion channelrhodopsin expression in the thalamus disrupts vertical*

1002 *migration to irradiance change*

1003 **a,b** Vertical position of control and *GAL4s1020t, UAS:GtACR1-eYFP* fish exposed to  
1004 alternating periods of light and darkness. Thin lines show trajectories of individual  
1005 fish, while the thicker red line indicates the average. Shading indicates 95%  
1006 confidence intervals. Overall, control fish move up when lights go ON and down  
1007 when lights go OFF. GtACR1-expressing fish have the opposite behavior. **c,e**  
1008 Correlation between light (1 for ON, 0 for OFF) and vertical movement. Error bars  
1009 indicate 95% confidence interval. Correlation is high for controls, but not for GtACR1  
1010 (c) or GtACR2 (e) expressing fish. **d,f** Direction of initial vertical movement at light  
1011 OFF for all fish, at all transitions. Blue indicates downward movement, while red  
1012 indicates upward movement. GtACR1 (d) and GtACR2 (f) expressing fish tend to  
1013 move upwards at light OFF, whereas non-expressing siblings tend to move down.  
1014 **g,h** Amount of movement of GtACR1 (g) and GtACR2 (h) expressing fish at light ON  
1015 and OFF averaged across all 6 cycles.

1016 **Supplementary Figures**

1017 *Fig. S1. The effect of parapineal lesion on habenula response to blue light.*

1018 **a** Visualization of the parapineal (yellow arrow), which is located adjacent to the left  
1019 habenula and innervates the dorsal neuropil. **b, c** Two photon lesioning of the  
1020 parapineal. **b** Before lesioning. **c** After lesioning, which led to formation of a bubble  
1021 (arrow). **d, e** Habenula cells segmented from 5 fish, overlaid on top of each other,

1022 showing responses before and after lesion. Cells responding to light ON are shown in  
1023 blue and to OFF in pink. **f, g** Heat maps of the habenula cells, in the 5 fish,  
1024 responding to light ON and OFF before (f) and after (g) lesioning the parapineal.  
1025 Horizontal black lines divide data from different fish. **h** Percentage of cells showing  
1026 ON and OFF responses before and after parapineal lesioning. **i, j** Histogram showing  
1027 distribution of mean intensity in habenula neurons during light ON (e) and OFF (f)  
1028 before and after lesion. Insets show cumulative distribution from all fish. P-values and  
1029 test statistic were obtained using the KS-test. pp:parapineal, lHb: Left Habenula,  
1030 rHb:Right Habenula, cv: circumventricular organ; a: anterior, p:posterior. Scale bar =  
1031 25  $\mu$ m.

1032 *Figure S2. Examples of signals that were excluded from visualisation of k-means*  
1033 *clusters.*

1034 **a-e** Pixels showing stimulus-independent activity in the thalamus, at 5 different focal  
1035 planes. Pixels are colored according to the traces in panel **f**. For clarity, these signals  
1036 were excluded from the visualisation of clusters representing light evoked activity  
1037 shown in Fig. 4a-e. **g** Stimulus-independent activity in the habenula. Pixels are  
1038 colored according to the traces in panel **h**. For clarity, these signals were excluded  
1039 from the visualisation of clusters representing light evoked activity shown in Fig. 1e-f.  
1040 **f, h** Cluster centers that did not represent light-evoked activity in the habenula,  
1041 obtained by running *K-means* on the time series of pixels in panel a-e and g. Th:  
1042 Thalamus, a:anterior, p:posterior. Scale bar = 25  $\mu$ m.

1043 **Movie legends**

1044 ***Movie 1. Z-stack through a brain following DiD injection into the dorsal left***

1045 ***habenula neuropil.***

1046 DiD label (cyan) is seen bilaterally in two clusters of neurons in the anterior thalamus,  
1047 starting from a depth of 65  $\mu\text{m}$  from the first plane. Sparse labeling can also be seen  
1048 in the ipsilateral entopeduncular nucleus (EN), at a depth of about 100 – 110  $\mu\text{m}$ .  
1049 Glutamatergic neurons are labeled by *vGlut2a:GAL4,UAS:eGFP* (yellow), while  
1050 GABAergic neurons are labeled by *gad1b:DsRed* (magenta). The left fasciculus  
1051 retroflexus is labeled by axons from the habenula. This is a dorsal view, with anterior  
1052 to the left. Gamma = 0.45.

1053 ***Movie 2. Z-stack through the brain following DiD injection into the dorsal right***

1054 ***habenula neuropil***

1055 Retrogradely labeled cells are seen primarily in the ipsilateral entopeduncular  
1056 nucleus (arrow). Labelled axons are also visible in the neuropils of the left habenula.  
1057 These may arise from neurons that innervate the anterior right thalamus and/or from  
1058 the right entopeduncular nucleus (arrow). This is a dorsal view, with anterior to the  
1059 left.

1060 ***Movie 3. Z-stack of 6 day old gad1b:DsRed, vglut2a:GAL4, UAS:eGFP fish.***

1061 GABAergic neurons (magenta) are visible in the thalamus, below the habenula.  
1062 Arrows indicate the anterior thalamic neuropil which contains DsRed-labelled fibers  
1063 (~50  $\mu\text{m}$  below the first plane). The entopeduncular nucleus does not contain DsRed-  
1064 labelled fibers. In the first frame, DsRed-labelled neurites are visible in the optic  
1065 tectum, but not in the habenula neuropil. Anterior is to the left. The stack goes from  
1066 dorsal to ventral. rHb: right habenula; lHb: left habenula; OT: optic tectum; EN:

1067 entopeduncular nucleus.

1068 *Movie 4. Lateral view of a fish following DiD injection in the dorsal left neuropil of*  
1069 *the habenula.*

1070 The right side of the fish shown in Movie 1. Thalamic neurons that have been  
1071 retrogradely labeled are shown in cyan. Glutamatergic neurons are labeled by  
1072 *vGlut2a:GAL4,UAS:eGFP* (yellow), while GABAergic neurons are labeled by  
1073 *gad1b:DsRed* (magenta). DiD labeled cells extend neurites into neuropil of the  
1074 anterior thalamus. A number are labeled by eGFP (arrows), but none are labeled by  
1075 DsRed. The optic tract is visible in the DIC image, and contains eGFP labeled axons.  
1076 Note that anterior is to the right in this stack.

1077 *Movie 5. Lateral view of the left anterior thalamus following injection of DiD (cyan)*  
1078 *into the dorsal left habenula neuropil and Dil (yellow) into the right eye.*

1079 The arrow shows intermingling of retinal and habenula afferent fibers in the thalamic  
1080 neuropil. The stack runs from lateral to medial, and habenula afferents and RGC  
1081 terminals meet anteriorly and medially to the optic tract. fr: fasciculus retroflexus. This  
1082 is a 6-day-old fish, with anterior to the left.

1083 *Movie 6. Z-stack of a 6 day old fish following CM-Dil injection into the pineal and*  
1084 *DiD into the dorsal left habenula.*

1085 Pineal axons (red) project laterally and then posteriorly. Arrows indicate axons that  
1086 enter anterior thalamic neuropil, where retrogradely labeled fibers from the habenula  
1087 (cyan) are visible. This is a dorsal view, with anterior to the left.

1088
